# Supplementary material for: A New L-Proline Amide Hydrolase with Potential Application within the Amidase Process
Source: MDPI journal article supplement (doi:10.3390/cryst12010018), 2021-12-23
Supplement: s1 [file s1]

# A new L-proline amide hydrolase with potential application within the Amidase Process

Sergio Martinez-Rodríguez<sup>a,b</sup>, Rafael Contreras-Montoya<sup>c</sup>, Jesús M. Torres de Pinedo<sup>a</sup>,  
Luis Álvarez de Cienfuegos<sup>c</sup> and Jose Antonio Gavira<sup>b</sup>

<sup>a</sup>Departamento de Bioquímica y Biología Molecular III e Inmunología, Universidad de Granada, Granada, 18071, Spain

<sup>b</sup>Laboratorio de Estudios Cristalográficos, CSIC, Armilla, Granada, 18100, Spain

<sup>c</sup>Departamento de Química Orgánica, Universidad de Granada, Granada, 18071, Spain

## Synthesis of different amino-acid amides

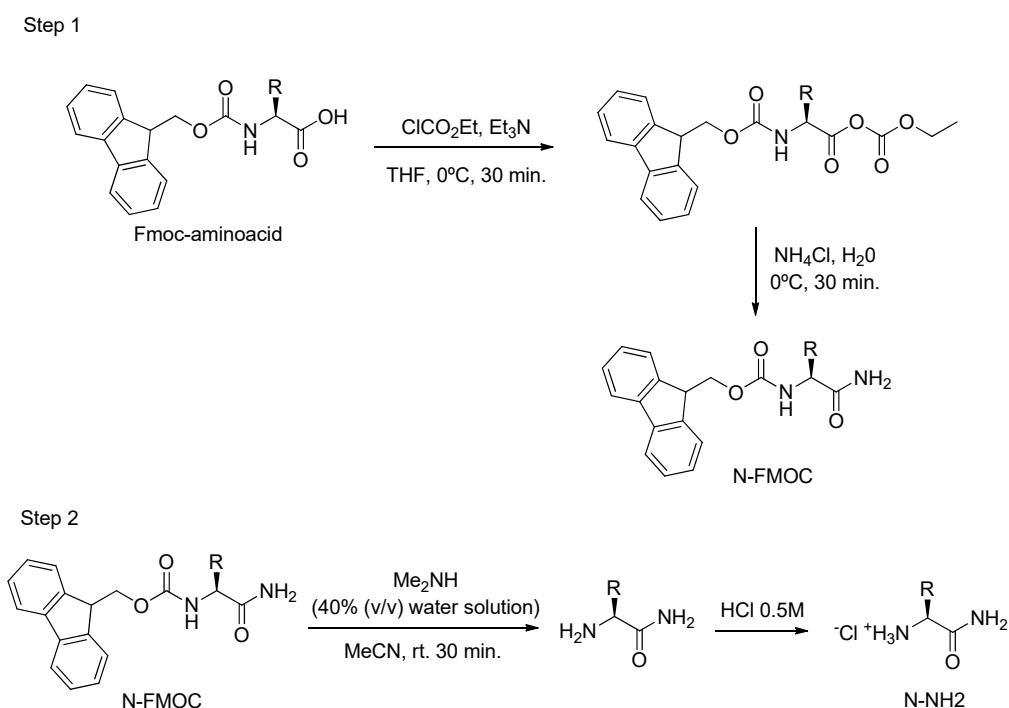

### General procedure:

**Step 1.** To a colorless solution of 0.50 mmol of Fmoc-amino acid in 10 mL of THF were added 67  $\mu\text{L}$  (0.70 mmol, 1.4 equiv) of  $\text{ClCO}_2\text{Et}$  and 209  $\mu\text{L}$  (1.5 mmol, 3.0 equiv) of  $\text{Et}_3\text{N}$  at 0  $^{\circ}\text{C}$ . After stirring for 30 min at 0  $^{\circ}\text{C}$ , 0.75 mL of a 1.0 M aqueous solution of  $\text{NH}_4\text{Cl}$  (0.75 mmol, 1.5 equiv) were added at 0  $^{\circ}\text{C}$  to the colorless suspension. The mixture was stirred for 30 min at 0  $^{\circ}\text{C}$  and 5 mL of  $\text{H}_2\text{O}$  were added. The colorless clear solution was extracted with 30 mL of  $\text{EtOAc}$  and the

aqueous layer was extracted with 20 mL of EtOAc. The organic layers were combined, washed with 5 mL of brine, and dried over anhydrous Na<sub>2</sub>SO<sub>4</sub>. The product purified via flash column chromatography on silica gel with mixtures of hexane and EtOAc to afford the Fmoc-amino acid-NH<sub>2</sub> (N-FMOC).

**Step 2.** To a colourless solution of 0.50 mmol of Fmoc-amino acid-NH<sub>2</sub> in 100 mL of MeCN, 10 mL of Me<sub>2</sub>NH 40% (v/v) water solution were added and the mixture was stirred for 30 min at room temperature. The resulting solution was then vacuum evaporated to obtain a white solid. The crude product was extracted with 100 mL of H<sub>2</sub>O and washed with three portions of 30 of diethyl ether. HCl 0.5 M was then added dropwise to the aqueous solution to reach a pH 2. The resulting acid solution was then freeze dried to obtain the final product.

*Product characterization:*

NMR spectra were recorded on 500 MHz spectrometer (Bruker); chemical shift ( $\delta$ ), referenced to the residual protonated solvent as an internal standard are quoted in ppm; coupling constants (*J*) are reported in Hz. High Resolution Mass Spectrometry was recorded using an Xevo G2-XS QToF (Waters, USA) mass spectrometer.

**Fmoc-L-2-ABA amide:**

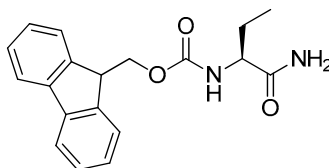

<sup>1</sup>H NMR (500 MHz, Methanol-*d*<sub>4</sub>)  $\delta$  7.81 (d, *J* = 7.5 Hz, 2H), 7.69 (t, *J* = 7.5 Hz, 2H), 7.41 (t, *J* = 7.5 Hz, 2H), 7.33 (t, *J* = 7.5 Hz, 2H), 4.46 – 4.37 (m, 2H), 4.24 (t, *J* = 6.9 Hz, 1H), 4.03 (dd, *J* = 8.6, 5.3 Hz, 1H), 1.89-1.79 (m, 1H), 1.72-1.61 (m, 1H), 0.99 (t, *J* = 7.4 Hz, 3H). <sup>13</sup>C NMR (126 MHz, Methanol-*d*<sub>4</sub>)  $\delta$  177.56, 158.51, 145.34, 145.21, 142.61, 128.77, 128.15, 128.13, 126.19, 126.17, 120.91, 67.84, 57.64, 48.46, 26.55, 10.68. Yield: 87%. HRMS (ESI): *m/z* calculated for C<sub>19</sub>H<sub>21</sub>N<sub>2</sub>O<sub>3</sub> [M+H]<sup>+</sup>: 325.1552; found: 325.1549.

**L-2-ABA amide · HCl:**

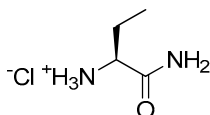

<sup>1</sup>H NMR (400 MHz, DMSO-*d*<sub>6</sub>)  $\delta$  8.28 (s, 3H), 8.00 (s, 1H), 7.48 (s, 1H), 3.72-3.62 (m, 1H), 1.91 – 1.68 (m, 2H), 0.89 (t, *J* = 7.5 Hz, 3H). <sup>13</sup>C NMR (101 MHz, DMSO-*d*<sub>6</sub>)  $\delta$  170.24, 53.11, 24.03, 8.97. Yield: 90%. HRMS (ESI): *m/z* calculated for C<sub>4</sub>H<sub>11</sub>N<sub>2</sub>O [M+H]<sup>+</sup>: 103.0871; found: 103.0873.

**Fmoc-L-*tert*-Leu amide:**

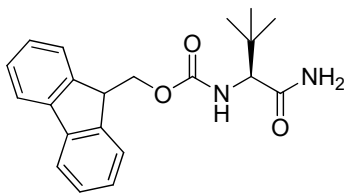

$^1\text{H}$  NMR (500 MHz,  $\text{DMSO-}d_6$ )  $\delta$  7.89 (d,  $J$  = 7.5 Hz, 2H), 7.76 (d,  $J$  = 7.5 Hz, 2H), 7.41 (t,  $J$  = 7.5, 2H), 7.38 (s, 1H), 7.34-7.28 (m, 2H), 7.16 (d,  $J$  = 9.8 Hz, 1H), 7.05 (s, 1H), 4.33 – 4.26 (m, 1H), 4.25 – 4.19 (m, 2H), 3.89 (d,  $J$  = 9.8 Hz, 1H), 0.93 (s, 9H).  $^{13}\text{C}$  NMR (126 MHz,  $\text{DMSO-}d_6$ )  $\delta$  172.15, 156.06, 143.88, 143.82, 140.70, 140.68, 127.65, 127.06, 125.41, 120.08, 65.78, 62.35, 33.72, 26.71. Yield: 86%. HRMS (ESI):  $m/z$  calculated for  $\text{C}_{21}\text{H}_{25}\text{N}_2\text{O}_3$   $[\text{M}+\text{H}]^+$ : 353.1865; found: 353.1865.

**L-*tert*-Leu amide  $\cdot$  HCl:**

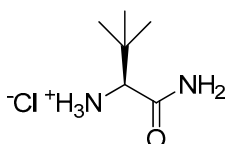

$^1\text{H}$  NMR (400 MHz,  $\text{DMSO-}d_6$ )  $\delta$  8.18 (s, 3H), 7.94 (s, 1H), 7.54 (s, 1H), 3.49 (d,  $J$  = 4.9 Hz, 1H), 1.00 (s, 9H).  $^{13}\text{C}$  NMR (101 MHz,  $\text{DMSO-}d_6$ )  $\delta$  169.51, 60.80, 32.92, 26.91. Yield: 95%. HRMS (ESI):  $m/z$  calculated for  $\text{C}_6\text{H}_{15}\text{N}_2\text{O}$   $[\text{M}+\text{H}]^+$ : 131.1184; found: 131.1180.

**Fmoc-L-*nor*Val amide:**

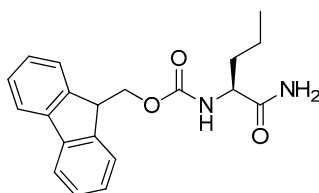

$^1\text{H}$  NMR (400 MHz,  $\text{DMSO-}d_6$ )  $\delta$  7.89 (d,  $J$  = 7.5 Hz, 2H), 7.73 (dd,  $J$  = 7.5, 4.2 Hz, 2H), 7.42 (t,  $J$  = 7.5, 2H), 7.36-7.29 (m, 3H), 7.27 (s, 1H), 6.95 (s, 1H), 4.32-4.18 (m, 3H), 3.92 (td,  $J$  = 8.8, 5.1 Hz, 1H), 1.67 – 1.43 (m, 2H), 1.40-1.20 (m, 2H), 0.86 (t,  $J$  = 7.3 Hz, 3H).  $^{13}\text{C}$  NMR (101 MHz,  $\text{DMSO-}d_6$ )  $\delta$  174.53, 156.41, 144.41, 144.28, 141.19, 128.10, 127.52, 125.79, 120.56, 66.01, 54.67, 47.20, 34.47, 19.17, 14.04. Yield: 84%. HRMS (ESI):  $m/z$  calculated for  $\text{C}_{20}\text{H}_{22}\text{N}_2\text{O}_3\text{Na}$   $[\text{M}+\text{Na}]^+$ : 361.1528; found: 361.1521

**L-norVal amide · HCl:**

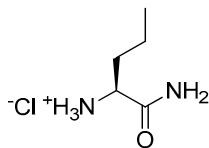

$^1\text{H}$  NMR (400 MHz, DMSO- $d_6$ )  $\delta$  8.27 (s, 3H), 7.99 (s, 1H), 7.49 (s, 1H), 3.70 (s, 1H), 1.80 – 1.64 (m, 2H), 1.42 – 1.24 (m, 2H), 0.88 (t,  $J$  = 7.3 Hz, 3H).  $^{13}\text{C}$  NMR (101 MHz, DMSO- $d_6$ )  $\delta$  170.44, 52.01, 32.94, 17.56, 13.60. Yield: 91%. HRMS (ESI):  $m/z$  calculated for  $\text{C}_5\text{H}_{13}\text{N}_2\text{O}$   $[\text{M}+\text{H}]^+$ : 117.1028; found: 117.1017.

**Fmoc-L-homoPhe amide:**

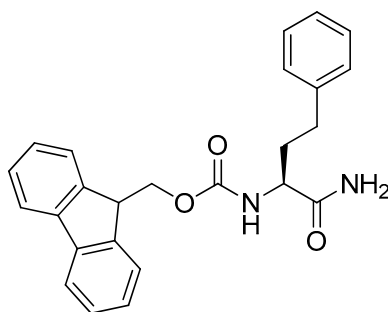

$^1\text{H}$  NMR (400 MHz, DMSO- $d_6$ )  $\delta$  7.90 (d,  $J$  = 7.5 Hz, 2H), 7.76 (dd,  $J$  = 7.5, 4.9 Hz, 2H), 7.50 (d,  $J$  = 8.3 Hz, 1H), 7.42 (d,  $J$  = 7.5, 2H), 7.38 – 7.24 (m, 5H), 7.19 (d,  $J$  = 7.2 Hz, 2H), 7.17 (s, 1H), 7.02 (s, 1H), 4.38 – 4.20 (m, 3H), 3.95 (td,  $J$  = 9.0, 4.6 Hz, 1H), 2.71 – 2.53 (m, 2H), 2.01 – 1.77 (m, 2H).  $^{13}\text{C}$  NMR (101 MHz, DMSO- $d_6$ )  $\delta$  173.76, 155.99, 143.91, 143.78, 141.38, 140.71, 128.28, 128.25, 127.61, 127.03, 125.79, 125.27, 120.07, 65.53, 54.28, 46.71, 33.70, 31.67. Yield: 87%. HRMS (ESI):  $m/z$  calculated for  $\text{C}_{25}\text{H}_{24}\text{N}_2\text{O}_3$   $[\text{M}+\text{H}]^+$ : 401.1865; found: 401.1862.

**L-homoPhe amide · HCl:**

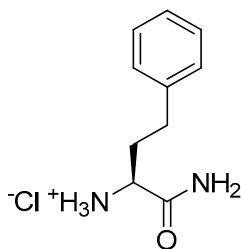

$^1\text{H}$  NMR (400 MHz, DMSO- $d_6$ )  $\delta$  8.37 (s, 3H), 8.03 (s, 1H), 7.55 (s, 1H), 7.31 – 7.24 (m, 2H), 7.22 – 7.15 (m, 3H), 3.80 (s, 1H), 2.69-2.55 (m, 2H), 2.09-1.95 (m, 2H).  $^{13}\text{C}$  NMR (101 MHz, DMSO- $d_6$ )  $\delta$  170.15, 140.68, 128.46, 128.11, 126.09, 52.13, 32.81, 30.37. Yield: 70%. HRMS (ESI):  $m/z$  calculated for  $\text{C}_{10}\text{H}_{15}\text{N}_2\text{O}$   $[\text{M}+\text{H}]^+$ : 179.1184; found: 179.1201.

**Fmoc-L-norLeu amide:**

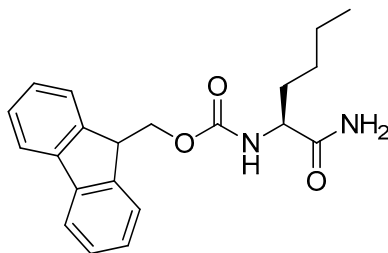

$^1\text{H}$  NMR (400 MHz,  $\text{DMSO-}d_6$ )  $\delta$  7.89 (d,  $J$  = 7.5 Hz, 2H), 7.74 (dd,  $J$  = 7.6, 3.9 Hz, 2H), 7.42 (t,  $J$  = 7.5, 2H), 7.37-7.30 (m, 3H), 7.27 (s, 1H), 6.96 (s, 1H), 4.35 – 4.19 (m, 3H), 3.91 (td,  $J$  = 8.8, 5.0 Hz, 1H), 1.70 – 1.46 (m, 2H), 1.35-1.21 (m, 4H), 0.88 (t,  $J$  = 7.3 Hz, 3H).  $^{13}\text{C}$  NMR (101 MHz,  $\text{DMSO-}d_6$ )  $\delta$  174.00, 155.90, 143.92, 143.78, 140.69, 127.60, 127.02, 125.29, 120.06, 65.51, 54.43, 46.69, 31.60, 27.64, 21.78, 13.85. Yield: 87%.

**Fmoc-L-norLeu amide  $\cdot$  HCl:**

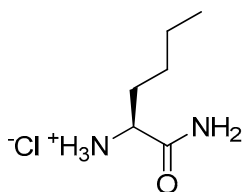

$^1\text{H}$  NMR (400 MHz,  $\text{DMSO-}d_6$ )  $\delta$  8.25 (s, 3H), 7.97 (s, 1H), 7.48 (s, 1H), 3.69 (t,  $J$  = 6.4 Hz, 1H), 1.79-1.66 (m, 2H), 1.33-1.22 (m, 4H), 0.86 (t,  $J$  = 7.3 Hz, 3H).  $^{13}\text{C}$  NMR (101 MHz,  $\text{DMSO-}d_6$ )  $\delta$  170.44, 52.15, 30.53, 26.22, 21.82, 13.71. Yield: 90%. HRMS (ESI):  $m/z$  calculated for  $\text{C}_6\text{H}_{15}\text{N}_2\text{O}$   $[\text{M}+\text{H}]^+$ : 131.1184; found: 131.1180.

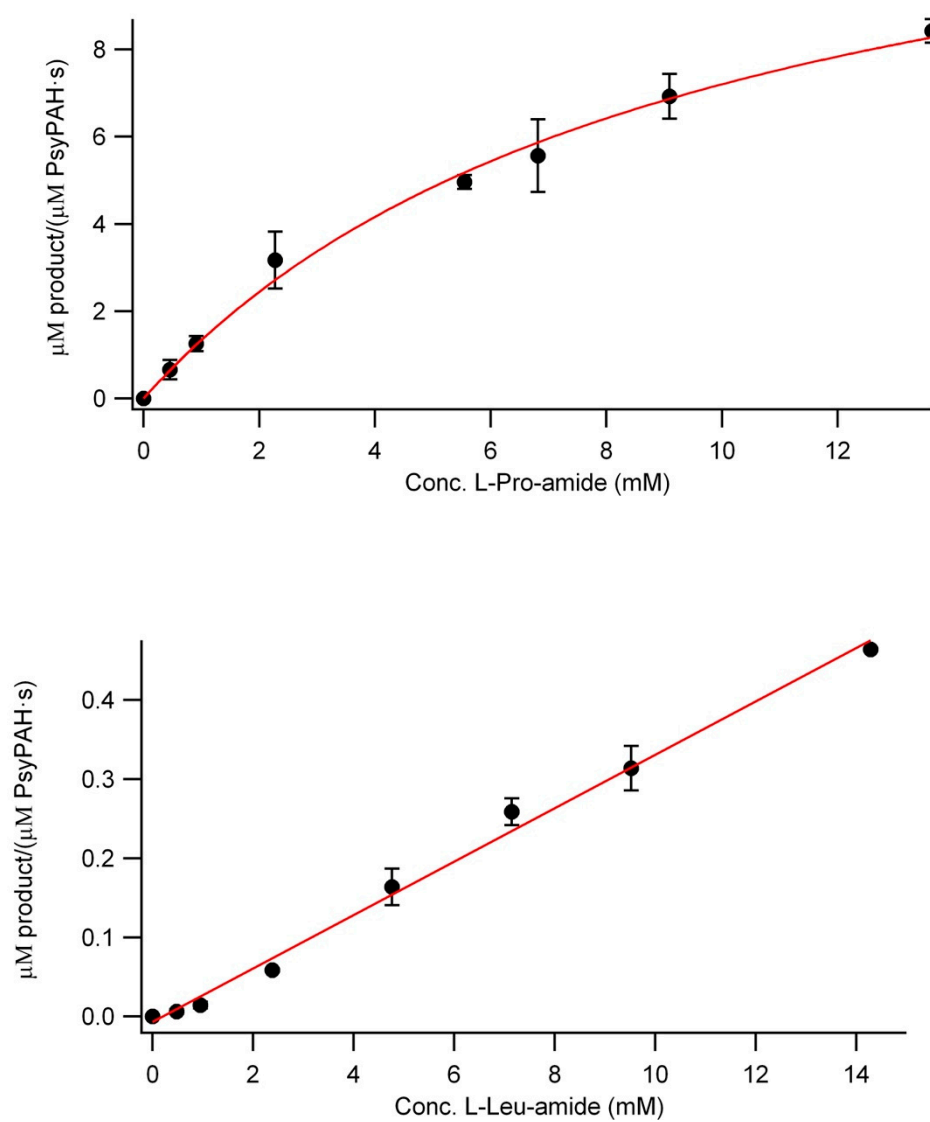

**Figure S1.** Kinetic determinations for L-Pro- and L-Leu-amide (35°C, pH 7.0).

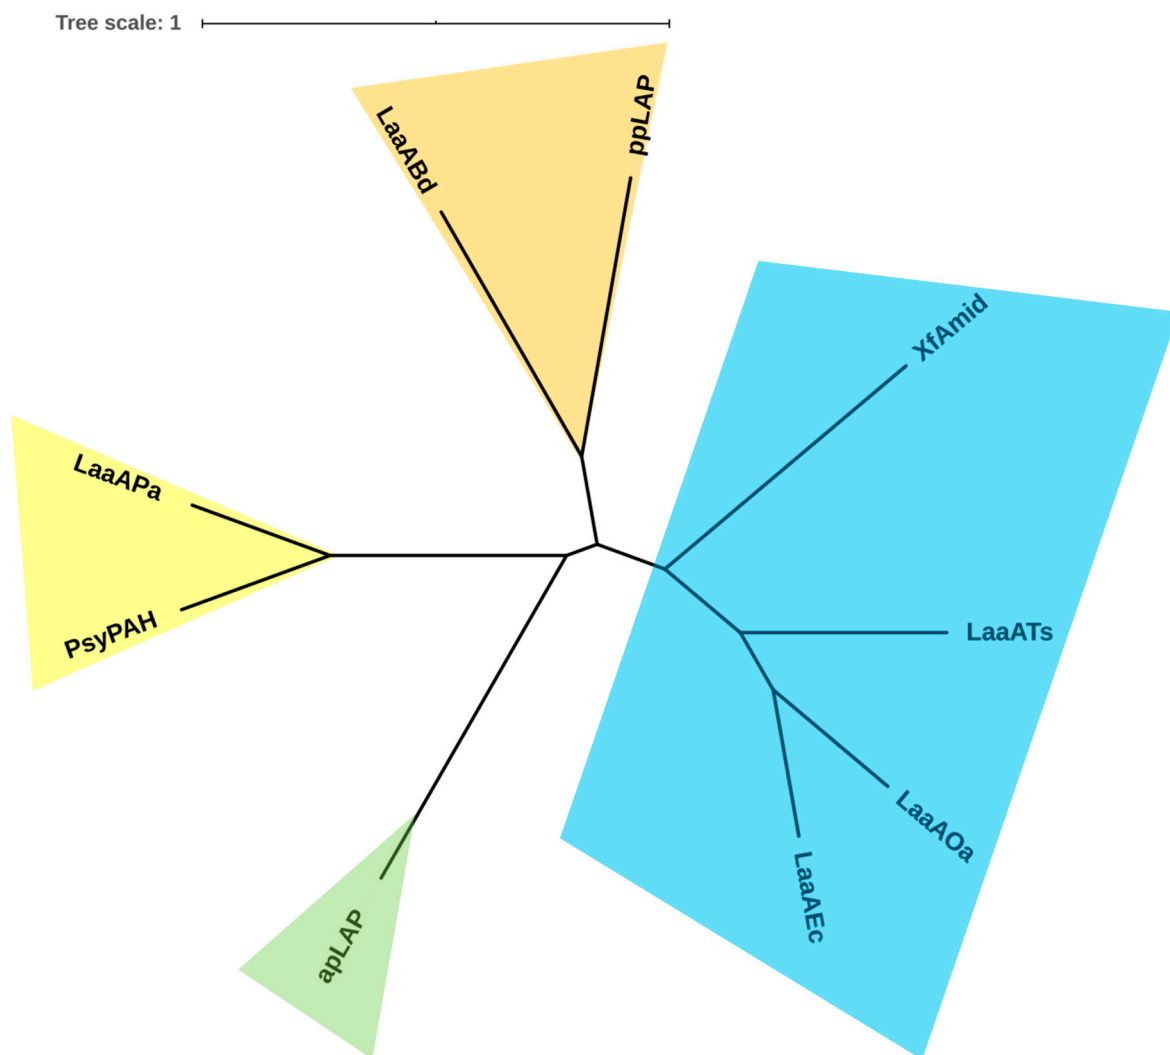

**Figure S2.** Phylogenetic analysis of different enzymes with proven L-amidase activity. The representative structures of each group are as follows: acetamidase/formamidase clan (blue, PDB ID: 3TKK), aminopeptidase M17 clan (orange, PDB ID: 3H8E), aminopeptidase M28 clan (green, PDB 1AMP) and peptidase S33 clan (yellow, PsyPAH, PDB 7A6G). Image was generated with i-tol (Letunic and Bork, 2019).

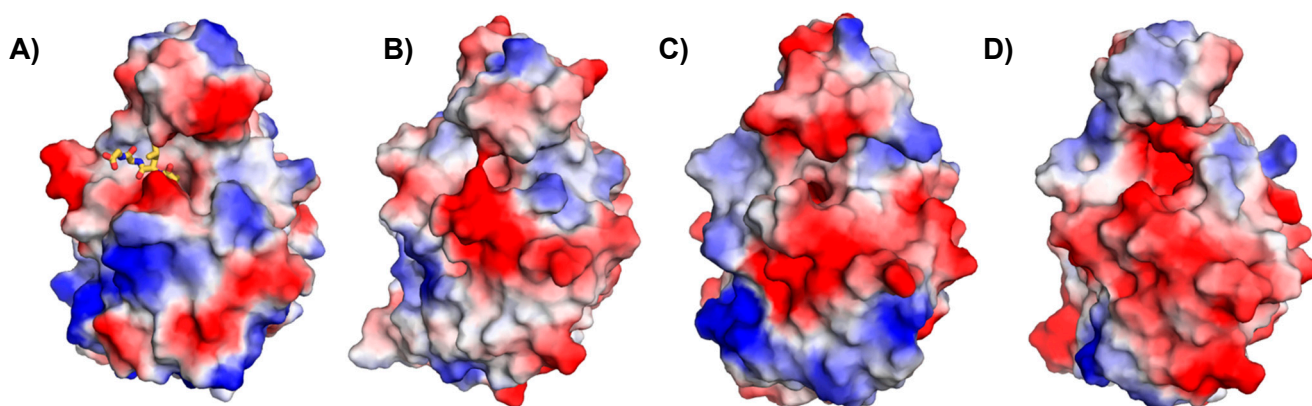

**Figure S3.** Surface representation of different peptidase S33 family members. A) APF1 from *Thermoplasma acidophilum* (E213Q mutant) bound to PLGG peptide (PDB 1XRP, peptide in stick mode, yellow tones), B) PsyPAH (PDB 7A6G), C) amidohydrolase VinJ (PDB 3WMR), and D) putative uncharacterized PAP from *Mycobacterium smegmatis* (PDB 3NWO). The orientation is exactly the same for the four structures. Qualitative charge-smoothed potential was generated with Pymol.



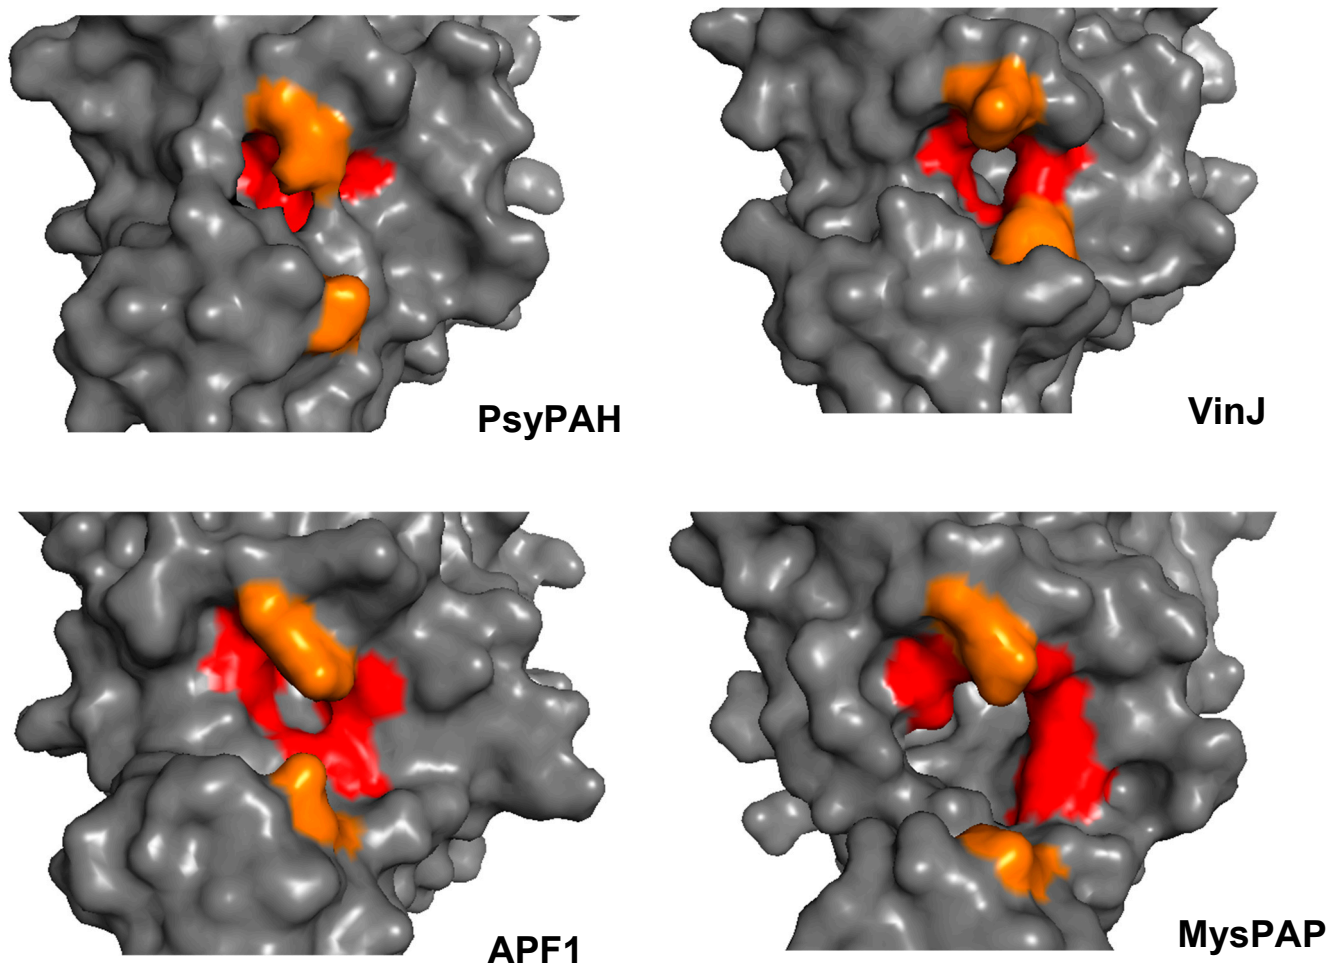

**Figure S4.** Comparison of the polyketide substrate binding site of VinJ (PDB 3WMR) with that of APF1 (PDB 1XRP), MysPAP (PDB 3NWO) and PsyPAH (PDB 7A6G). The position of the hydrophobic tunnel (Shinohara et al., 2014) is shown in red, whereas additional residues suggested to bind the polyketide moiety in VinJ are shown in orange.

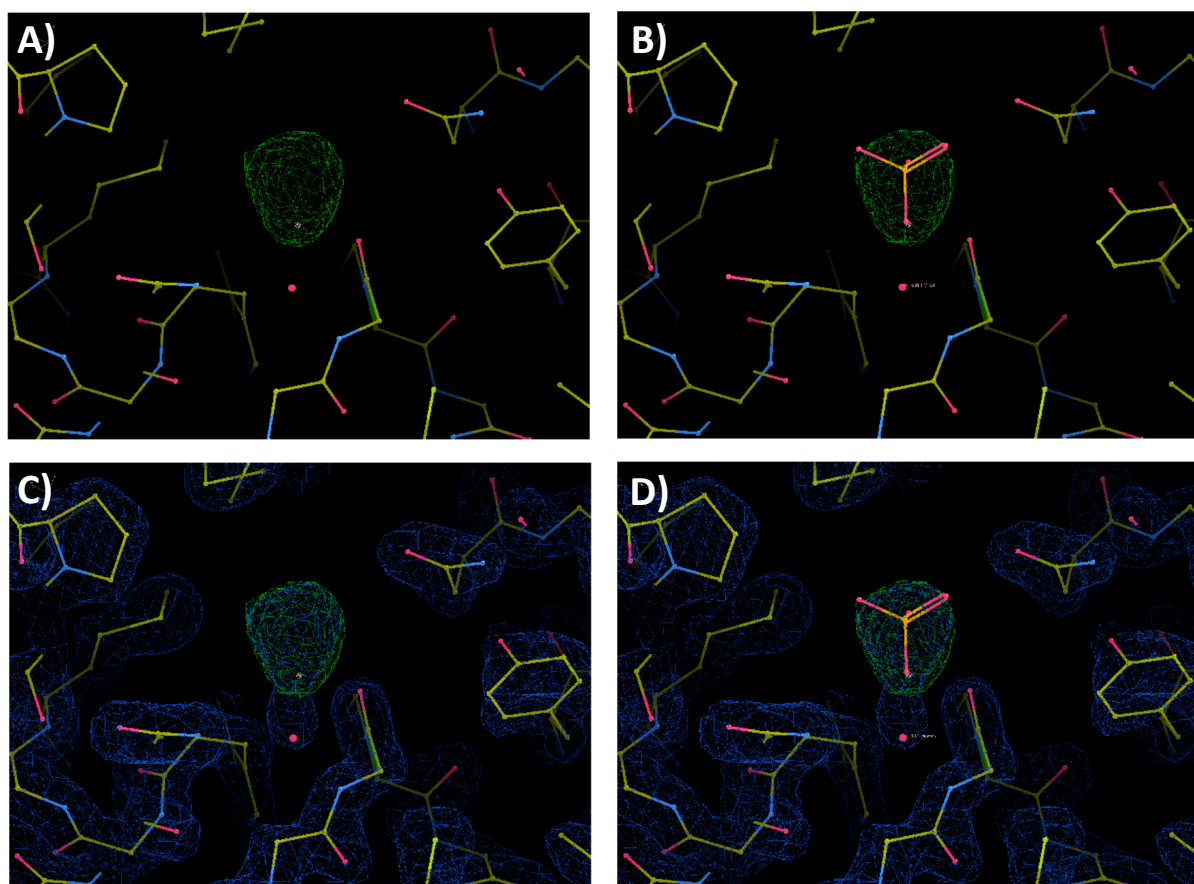

**Figure S5.** Omit maps calculated for PsyPAH structure. A)  $|mFo-DFc|$  omit maps (green) calculated using the deposited model PDB ID. 7A6G omitting the phosphate molecule and contoured at a 4.1  $\sigma$  level. The current phosphate moiety is shown in B. C and D also shows the  $|2mFo-DFc|$  omit maps of the whole model (blue) contoured at a 1.5  $\sigma$  level with (C) and without (D) the phosphate molecule.

| CHAIN  | Z    | rmsd | lali | nres | %id | Nomenclature                                      |
|--------|------|------|------|------|-----|---------------------------------------------------|
| 3WMR-A | 48.6 | 1    | 296  | 296  | 55  | PROLINE IMINOPEPTIDASE;                           |
| 3NWO-A | 43.1 | 2.2  | 291  | 299  | 50  | PROLINE IMINOPEPTIDASE;                           |
| 1MU0-A | 41.9 | 1.7  | 292  | 294  | 34  | PROLINE IMINOPEPTIDASE;                           |
| 5H3H-B | 28.3 | 2.4  | 245  | 269  | 20  | ABHYDROLASE DOMAIN-CONTAINING PROTEIN;            |
| 2YYS-A | 28.2 | 2.4  | 257  | 283  | 19  | PROLINE IMINOPEPTIDASE-RELATED PROTEIN;           |
| 3FOB-A | 27.4 | 2.3  | 241  | 277  | 20  | BROMOPEROXIDASE;                                  |
| 1A8Q-A | 27.3 | 2.3  | 241  | 274  | 19  | BROMOPEROXIDASE A1;                               |
| 4UHC-A | 27.2 | 2.3  | 237  | 278  | 21  | ESTERASE;                                         |
| 2XUA-H | 27.1 | 2.7  | 244  | 261  | 23  | 3-OXOADIPATE ENOL-LACTONASE;                      |
| 1A88-A | 27   | 2.5  | 244  | 275  | 16  | CHLOROPEROXIDASE L;                               |
| 1J1I-A | 26.9 | 2.5  | 241  | 258  | 20  | META CLEAVAGE COMPOUND HYDROLASE;                 |
| 1A8S-A | 26.9 | 2.4  | 242  | 273  | 17  | CHLOROPEROXIDASE F;                               |
| 3OM8-B | 26.8 | 2.5  | 238  | 265  | 23  | PROBABLE HYDROLASE;                               |
| 6EB3-B | 26.6 | 3.1  | 245  | 268  | 22  | EST1;                                             |
| 1ZOI-A | 26.6 | 2.5  | 244  | 275  | 14  | ESTERASE;                                         |
| 1VA4-A | 26.5 | 2.4  | 243  | 271  | 18  | ARYLESTERASE;                                     |
| 4RNC-A | 26.5 | 2.6  | 251  | 281  | 20  | ESTERASE;                                         |
| 4I3F-A | 26.5 | 2.6  | 246  | 283  | 17  | SERINE HYDROLASE CCSP0084;                        |
| 4DGQ-A | 26.5 | 2.5  | 245  | 277  | 15  | NON-HEME CHLOROPEROXIDASE;                        |
| 4LXH-A | 26.4 | 2.7  | 251  | 276  | 20  | MCP HYDROLASE;                                    |
| 4QES-A | 26.3 | 2.5  | 243  | 441  | 19  | NON-HAEM BROMOPEROXIDASE BPO-A2, MATRIX PROTEIN 1 |
| 4X00-A | 26.2 | 2.6  | 253  | 273  | 18  | PUTATIVE HYDROLASE;                               |
| 5EGN-A | 26.1 | 2.7  | 244  | 260  | 21  | ESTERASE;                                         |
| 1IUN-B | 26   | 2.7  | 240  | 276  | 17  | META-CLEAVAGE PRODUCT HYDROLASE;                  |
| 1C4X-A | 26   | 2.6  | 250  | 281  | 18  | PROTEIN (2-HYDROXY-6-OXO-6-PHENYLHEXA-2,4-DIENOAT |
| 1U2E-A | 25.9 | 2.8  | 251  | 286  | 18  | 2-HYDROXY-6-KETONONA-2,4-DIENEDIOIC ACID          |
| 2OG1-A | 25.8 | 2.6  | 247  | 285  | 20  | 2-HYDROXY-6-OXO-6-PHENYLHEXA-2,4-DIENOATE HYDROLA |
| 4OPM-A | 25.8 | 2.6  | 244  | 299  | 17  | LIPASE;                                           |
| 6AZD-A | 25.7 | 2.5  | 242  | 266  | 17  | PPKA12-LIKE H;                                    |
| 6I8W-A | 25.6 | 2.7  | 245  | 310  | 18  | ALPHA/BETA FOLD HYDROLASE;                        |
| 2OCI-A | 25.5 | 2.6  | 236  | 255  | 16  | VALACYCLOVIR HYDROLASE;                           |
| 4NS4-A | 25.5 | 2.4  | 238  | 271  | 20  | ALPHA/BETA HYDROLASE FOLD PROTEIN;                |
| 3E0X-A | 25.4 | 2.3  | 228  | 245  | 16  | LIPASE-ESTERASE RELATED PROTEIN;                  |
| 5FRD-A | 25.3 | 2.4  | 239  | 256  | 17  | CARBOXYLESTERASE (EST-2);                         |
| 4G8B-A | 25.3 | 2.8  | 244  | 277  | 17  | ALPHA/BETA HYDROLASE FOLD PROTEIN;                |
| 1Q0R-A | 25.1 | 3.1  | 252  | 297  | 18  | ACLACINOMYCIN METHYLESTERASE;                     |
| 4PW0-A | 25.1 | 3    | 244  | 275  | 18  | ALPHA/BETA HYDROLASE FOLD PROTEIN;                |
| 4F0J-A | 25   | 2.5  | 246  | 312  | 17  | PROBABLE HYDROLYTIC ENZYME;                       |
| 3V48-A | 25   | 2.8  | 240  | 268  | 15  | PUTATIVE AMINOACRYLATE HYDROLASE RUTD;            |
| 6BRT-A | 25   | 2.5  | 242  | 285  | 15  | D3-CTH-D14-D-RING;                                |
| 1HKH-A | 24.9 | 2.6  | 240  | 279  | 18  | GAMMA LACTAMASE;                                  |
| 6EIC-B | 24.9 | 2.5  | 236  | 279  | 18  | MYCOBACTERIUM TUBERCULOSIS MONOGLYCERIDE LIPASE;  |
| 3E3A-B | 24.8 | 2.6  | 240  | 275  | 19  | POSSIBLE PEROXIDASE BPOC;                         |
| 3OOS-A | 24.7 | 3.6  | 256  | 278  | 18  | ALPHA/BETA HYDROLASE FAMILY PROTEIN;              |
| 1AZW-A | 24.6 | 2.9  | 263  | 313  | 18  | PROLINE IMINOPEPTIDASE;                           |
| 4Q3L-B | 24.6 | 2.8  | 239  | 280  | 21  | MGS-M2;                                           |
| 4PSU-A | 24.6 | 2.8  | 245  | 286  | 13  | ALPHA/BETA HYDROLASE;                             |
| 1WOM-A | 24.6 | 2.7  | 241  | 271  | 18  | SIGMA FACTOR SIGB REGULATION PROTEIN RSBQ;        |
| 4DNQ-I | 24.6 | 2.6  | 241  | 264  | 17  | DAD2;                                             |
| 3QVM-B | 24.4 | 2.7  | 243  | 280  | 16  | OLEI00960;                                        |
| 6F9O-A | 24.4 | 2.7  | 247  | 309  | 13  | HALOALKANE DEHALOGENASE;                          |
| 3QYJ-A | 24.4 | 3    | 251  | 291  | 14  | ALR0039 PROTEIN;                                  |
| 4MJ3-B | 24.3 | 2.5  | 242  | 303  | 14  | HALOALKANE DEHALOGENASE;                          |
| 5NG7-A | 24.3 | 3.1  | 251  | 292  | 19  | EPOXIDE HYDROLASE;                                |
| 4IH4-A | 24.2 | 2.5  | 239  | 261  | 18  | AT3G03990/T11I18_10;                              |
| 4NVR-A | 24.2 | 3    | 253  | 302  | 15  | PUTATIVE ACYLTRANSFERASE;                         |
| 5LKA-A | 24.2 | 2.9  | 257  | 301  | 15  | HALOALKANE DEHALOGENASE;                          |
| 5A62-A | 24.2 | 2.7  | 242  | 272  | 22  | PUTATIVE ALPHA/BETA HYDROLASE FOLD PROTEIN;       |
| 3R3U-A | 24.2 | 3    | 255  | 304  | 18  | FLUOROACETATE DEHALOGENASE;                       |
| 5YHP-B | 24.2 | 2.9  | 266  | 319  | 17  | COLD ACTIVE PROLINE IMINOPEPTIDASE;               |

| CHAIN  | Z    | rmsd | lali | nres | %id | Nomenclature                                      |
|--------|------|------|------|------|-----|---------------------------------------------------|
| 2VF2-A | 24.1 | 2.6  | 242  | 284  | 21  | 2-HYDROXY-6-OXO-6-PHENYLHEXA-2,4-DIENOATE         |
| 5Z7W-B | 24.1 | 2.7  | 246  | 271  | 15  | HYPOSENSITIVE TO LIGHT 1;                         |
| 1QTR-A | 24.1 | 3.1  | 264  | 314  | 16  | PROLYL AMINOPEPTIDASE;                            |
| 5O7G-A | 24   | 3    | 249  | 310  | 16  | ALPHA/BETA HYDROLASE FAMILY PROTEIN;              |
| 5Z7Z-B | 24   | 2.6  | 238  | 266  | 16  | DWARF 14;                                         |
| 1Y37-A | 23.9 | 3    | 252  | 294  | 16  | FLUOROACETATE DEHALOGENASE;                       |
| 4HAI-A | 23.9 | 2.7  | 239  | 548  | 19  | BIFUNCTIONAL EPOXIDE HYDROLASE 2;                 |
| 4KAJ-A | 23.9 | 3.1  | 254  | 300  | 16  | PENTAETHYLENE GLYCOL;                             |
| 5CBK-A | 23.9 | 2.8  | 242  | 271  | 14  | SHHTL5;                                           |
| 4C6H-A | 23.9 | 2.9  | 250  | 291  | 18  | HALOALKANE DEHALOGENASE;                          |
| 6ATX-A | 23.8 | 2.7  | 242  | 265  | 16  | PPKA12-LIKE C;                                    |
| 6QE2-A | 23.8 | 2.5  | 224  | 257  | 16  | MONOACYLGLYCEROL LIPASE;                          |
| 4HTA-A | 23.8 | 2.7  | 243  | 270  | 14  | HYDROLASE, ALPHA/BETA FOLD FAMILY PROTEIN;        |
| 3BWX-A | 23.8 | 3.1  | 248  | 285  | 14  | ALPHA/BETA HYDROLASE;                             |
| 5HDF-B | 23.7 | 3.1  | 249  | 320  | 18  | HYDROLASE;                                        |
| 2QVB-A | 23.7 | 3    | 256  | 296  | 13  | HALOALKANE DEHALOGENASE 3;                        |
| 6J2R-A | 23.7 | 2.6  | 238  | 267  | 16  | HYPOSENSITIVE TO LIGHT 8;                         |
| 1B6G-A | 23.7 | 2.8  | 248  | 310  | 17  | HALOALKANE DEHALOGENASE;                          |
| 2XMZ-A | 23.6 | 2.8  | 232  | 266  | 21  | HYDROLASE, ALPHA/BETA HYDROLASE FOLD FAMILY;      |
| 3WI7-A | 23.6 | 3.1  | 254  | 291  | 14  | HALOALKANE DEHALOGENASE;                          |
| 3U1T-B | 23.6 | 3    | 253  | 299  | 14  | DMMA HALOALKANE DEHALOGENASE;                     |
| 6G75-A | 23.6 | 3    | 250  | 296  | 14  | COMMON ANCESTOR OF HALOALKANE DEHALOGENASE AND RE |
| 5Z7X-A | 23.6 | 2.8  | 242  | 270  | 16  | HYPOSENSITIVE TO LIGHT 4;                         |
| 1M33-A | 23.5 | 2.8  | 232  | 255  | 19  | BIOH PROTEIN;                                     |
| 4CCY-A | 23.5 | 3    | 243  | 285  | 15  | CARBOXYLESTERASE YBFK;                            |
| 6A9D-A | 23.4 | 2.8  | 243  | 275  | 16  | HYPOSENSITIVE TO LIGHT 7;                         |
| 3KXP-A | 23.4 | 3.2  | 241  | 268  | 13  | ALPHA-(N-ACETYLAMINOMETHYLENE)SUCCINIC ACID       |
| 5NFQ-A | 23.4 | 2.9  | 249  | 298  | 18  | EPOXIDE HYDROLASE BELONGING TO ALPHA/BETA HYDROLA |
| 3AFI-B | 23.4 | 3.1  | 254  | 302  | 16  | HALOALKANE DEHALOGENASE;                          |
| 5XM6-A | 23.4 | 2.6  | 238  | 318  | 16  | EPOXIDE HYDROLASE;                                |
| 3HJU-A | 23.4 | 2.6  | 232  | 291  | 13  | MONOGLYCERIDE LIPASE;                             |
| 4UFO-A | 23.4 | 2.8  | 241  | 321  | 15  | EPOXIDE HYDROLASE;                                |
| 3FSG-A | 23.4 | 3.3  | 239  | 267  | 18  | ALPHA/BETA SUPERFAMILY HYDROLASE;                 |
| 2R11-D | 23.3 | 3    | 243  | 288  | 17  | CARBOXYLESTERASE NP;                              |
| 3SK0-A | 23.2 | 3    | 252  | 308  | 16  | HALOALKANE DEHALOGENASE;                          |
| 3KDA-A | 23.2 | 2.9  | 256  | 298  | 14  | CFTR INHIBITORY FACTOR (CIF);                     |
| 2XT0-A | 23.2 | 2.9  | 245  | 297  | 16  | HALOALKANE DEHALOGENASE;                          |
| 4B9A-A | 23.2 | 3.1  | 251  | 298  | 14  | PROBABLE EPOXIDE HYDROLASE;                       |
| 2PSF-A | 23.2 | 3    | 248  | 307  | 14  | RENILLA-LUCIFERIN 2-MONOOXYGENASE;                |
| 4IO0-A | 23.1 | 3.2  | 252  | 288  | 17  | SOLUBLE EPOXIDE HYDROLASE;                        |
| 6K5E-B | 23.1 | 2.7  | 231  | 253  | 20  | PIMELOYL-[ACYL-CARRIER PROTEIN] METHYL ESTER ESTE |
| 4NMW-A | 23.1 | 2.9  | 232  | 254  | 19  | PIMELYL-[ACYL-CARRIER PROTEIN] METHYL ESTER ESTER |
| 4OSE-B | 23.1 | 3.1  | 242  | 284  | 15  | PUTATIVE HYDROLASE;                               |
| 4ZWN-B | 23   | 2.8  | 241  | 311  | 12  | MONOGLYCERIDE LIPASE;                             |
| 6XY9-A | 23   | 3    | 250  | 303  | 16  | HALOALKANE DEHALOGENASE;                          |
| 6KHM-K | 23   | 3    | 249  | 312  | 18  | HYDROLASE, ALPHA/BETA DOMAIN PROTEIN;             |
| 5ESR-A | 22.9 | 2.8  | 243  | 308  | 12  | HALOALKANE DEHALOGENASE;                          |
| 5MXP-A | 22.8 | 3.2  | 254  | 294  | 14  | ALPHA/BETA HYDROLASE;                             |
| 5W15-A | 22.8 | 2.9  | 242  | 270  | 17  | ALPHA/BETA HYDROLASE FOLD PROTEIN;                |
| 3BDI-A | 22.8 | 2.2  | 197  | 207  | 18  | UNCHARACTERIZED PROTEIN TA0194;                   |
| 5CW2-A | 22.7 | 2.8  | 251  | 319  | 17  | PUTATIVE EPOXIDE HYDROLASE EPHA;                  |
| 5DNW-A | 22.7 | 2.8  | 236  | 274  | 17  | SHKA12IB;                                         |
| 5JD6-A | 22.7 | 2.7  | 211  | 219  | 20  | MGS-MCHE2;                                        |
| 2E3J-A | 22.6 | 2.7  | 249  | 346  | 15  | EPOXIDE HYDROLASE EPHB;                           |
| 1EHY-A | 22.4 | 3.3  | 243  | 282  | 14  | PROTEIN (SOLUBLE EPOXIDE HYDROLASE);              |
| 5ALJ-A | 22.3 | 2.6  | 235  | 523  | 19  | BIFUNCTIONAL EPOXIDE HYDROLASE 2;                 |
| 5XWZ-B | 22.3 | 2.9  | 244  | 264  | 12  | UNPLACED GENOMIC SCAFFOLD SUPERCONT1.36, WHOLE GE |
| 5XO7-F | 22.2 | 2.9  | 245  | 264  | 13  | LACTONASE FOR PROTEIN;                            |
| 5XMW-A | 22.2 | 3    | 248  | 270  | 14  | ZEARALENONE LACTONASE;                            |
| 3PF8-A | 22.1 | 2.8  | 217  | 251  | 16  | CINNAMOYL ESTERASE;                               |

| CHAIN  | Z    | rmsd | lali | nres | %id | Nomenclature                                      |
|--------|------|------|------|------|-----|---------------------------------------------------|
| 2WTM-A | 22.1 | 2.8  | 216  | 250  | 15  | EST1E;                                            |
| 6LZH-A | 22   | 2.8  | 232  | 289  | 13  | GRGF;                                             |
| 4LOC-A | 22   | 2.7  | 225  | 255  | 16  | DEFORMYLASE;                                      |
| 3QIT-B | 21.9 | 3.9  | 234  | 283  | 20  | POLYKETIDE SYNTHASE;                              |
| 4KE6-E | 21.9 | 2.9  | 208  | 226  | 16  | THERMOSTABLE MONOACYLGLYCEROL LIPASE;             |
| 5URO-A | 21.7 | 3    | 243  | 336  | 14  | PREDICTED PROTEIN;                                |
| 3C5V-A | 21.6 | 3    | 236  | 294  | 15  | PROTEIN PHOSPHATASE METHYLESTERASE 1;             |
| 5XMD-B | 21.6 | 3.1  | 240  | 322  | 15  | EPOXIDE HYDROLASE A;                              |
| 4MEA-A | 21.6 | 2.9  | 249  | 324  | 12  | PREDICTED PROTEIN;                                |
| 6RA3-A | 21.5 | 3    | 240  | 267  | 14  | PUTATIVE DIOXYGENASE (1H-3-HYDROXY-4-OXOQUINALDIN |
| 4Y7D-A | 21.4 | 3.1  | 236  | 289  | 17  | ALPHA/BETA HYDROLASE FOLD PROTEIN;                |
| 4LHE-A | 21.4 | 3.4  | 223  | 250  | 17  | THERMOSTABLE MONOACYLGLYCEROL LIPASE;             |
| 2WM2-C | 21.3 | 3.1  | 242  | 277  | 12  | 1-H-3-HYDROXY-4-OXOQUINALDINE 2,4-DIOXYGENASE;    |
| 5G59-A | 21.1 | 2.7  | 212  | 274  | 17  | ESTERASE;                                         |
| 6NY9-B | 21.1 | 4    | 228  | 250  | 18  | MYCOPHENOLIC ACID ACYL-GLUCURONIDE ESTERASE, MITO |
| 6T6H-A | 21   | 2.8  | 228  | 253  | 14  | BOTH;                                             |
| 3R0V-A | 21   | 2.8  | 217  | 257  | 19  | ALPHA/BETA HYDROLASE FOLD PROTEIN;                |
| 3LLC-A | 21   | 3.5  | 224  | 261  | 17  | PUTATIVE HYDROLASE;                               |
| 3IBT-A | 21   | 3.1  | 234  | 263  | 14  | 1H-3-HYDROXY-4-OXOQUINOLINE 2,4-DIOXYGENASE;      |
| 5BOV-B | 20.7 | 3.2  | 248  | 302  | 18  | PUTATIVE EPOXIDE HYDROLASE PROTEIN;               |
| 4GDM-C | 20.7 | 3.1  | 227  | 259  | 19  | 2-SUCCINYL-6-HYDROXY-2,4-CYCLOHEXADIENE-1-CARBOXY |
| 5UGQ-A | 20.6 | 3    | 259  | 463  | 14  | CARBOXYLESTERASE A;                               |
| 4FBM-A | 20.6 | 3    | 214  | 252  | 15  | LIPS LIPOLYTIC ENZYME;                            |
| 2JBW-B | 20.4 | 2.8  | 215  | 360  | 19  | 2,6-DIHYDROXY-PSEUDO-OXYNICOTINE HYDROLASE;       |
| 3BF7-A | 20.2 | 3.3  | 225  | 255  | 16  | ESTERASE YBFF;                                    |
| 1IMJ-A | 20.1 | 2.2  | 191  | 208  | 16  | CCG1-INTERACTING FACTOR B;                        |

**Table S1.** Homolog structures of PsyPAH obtained with the DALI server (Holm, 2020). PAP and PAP-like enzymes are highlighted.

| PDB ID | Structural model                                      |
|--------|-------------------------------------------------------|
| 1MU0   | APF1 Complex with PCK                                 |
| 1XQW   | APF1 -mutant S105A complex with Phe-Leu               |
| 1XQX   | APF1-mutant S105A complex with PCK                    |
| 1XQY   | APF1-mutant S105A complex with Pro-Leu-Gly-Gly        |
| 1XRL   | APF1-mutant Y205F complex with inhibitor PCK          |
| 1XRM   | APF1-mutant E213Q soaked with peptide Ala-Phe         |
| 1XRN   | APF1-mutant E213Q soaked with peptide Phe-Ala         |
| 1XRO   | APF1-mutant E213Q soaked with peptide Phe-Leu         |
| 1XRP   | APF1-mutant E213Q soaked with peptide Pro-Leu-Gly-Gly |
| 1XRQ   | APF1-mutant E245Q soaked with peptide Phe-Leu         |
| 1XRR   | APF1-mutant E245Q soaked with peptide Pro-Pro         |

**Table S2.** Different ligand-bound structures of Tricorn Interacting Factor F1 (APF1)

| Structural motifs        | APF1<br>(1XRP)          | PsyPAH<br>(7A6G)        | VinJ<br>(3WMR)          | MysPA<br>P              |
|--------------------------|-------------------------|-------------------------|-------------------------|-------------------------|
| E1 site                  | Y178                    | Y186                    | Y183                    | Y186                    |
|                          | W188                    | W196                    | W193                    | T196                    |
|                          | L196                    | F204                    | F201                    | V204                    |
|                          | Y205                    | Y214                    | Y211                    | Y214                    |
|                          | N212                    | T221                    | N218                    | .. <sup>#</sup>         |
| S1 site (cap domain)     | V134                    | M142                    | M139                    | M142                    |
|                          | T137                    | W145*                   | W142                    | W145                    |
|                          | M141                    | A149                    | M146                    | A149*                   |
|                          | N209                    | N218                    | N215                    | N218                    |
|                          | I216                    | V225                    | V222                    | V225                    |
|                          | I220                    | M229                    | L226                    | L229                    |
|                          | W223                    | W232                    | W229                    | W232                    |
| S1 site (catal. dom.)    | P38                     | P43                     | P40                     | P43                     |
|                          | I79                     | V87                     | V84                     | P88                     |
|                          | Y106 <sup>b</sup>       | W114 <sup>b</sup>       | W111 <sup>b</sup>       | W114 <sup>b</sup>       |
|                          | A109                    | M117                    | M114                    | M117P1                  |
|                          | L131                    | P139                    | P136                    | P139                    |
|                          | V246                    | A255                    | A252                    | A255                    |
|                          | V250                    | V259                    | T256                    | T259                    |
| S1' site                 | L182                    | V190                    | V187                    | V190                    |
|                          | L183                    | C191                    | C188                    | C191                    |
|                          | W188                    | W196                    | W193                    | T196                    |
|                          | V192                    | V200                    | F197                    | F200                    |
|                          | S195                    | T203                    | T200                    | S203                    |
|                          | M40                     | C45                     | S42                     | M45                     |
|                          | Y44                     | Y49                     | Y46                     | Y49                     |
|                          | L272                    | M281                    | V278                    | C281                    |
| P site                   | S104                    | Q112                    | Q109                    | Q112                    |
|                          | S128                    | A136                    | A132                    | C136                    |
|                          | T239                    | I248                    | L245                    | I248                    |
|                          | <b>D244<sup>a</sup></b> | <b>D253<sup>a</sup></b> | <b>D250<sup>a</sup></b> | <b>D253<sup>a</sup></b> |
|                          | <b>H271<sup>a</sup></b> | <b>H280<sup>a</sup></b> | <b>H277<sup>a</sup></b> | <b>H280<sup>a</sup></b> |
|                          | T273                    | P282                    | P279                    | T282                    |
| Other catalytic residues | G37 <sup>b</sup>        | G42 <sup>b</sup>        | G39 <sup>b</sup>        | G42 <sup>b</sup>        |
|                          | <b>S105<sup>a</sup></b> | <b>S113<sup>a</sup></b> | <b>S110<sup>a</sup></b> | <b>S113<sup>a</sup></b> |
|                          | E213 <sup>c</sup>       | E222                    | E219                    | .. <sup>#</sup>         |
|                          | E245 <sup>c</sup>       | E254                    | E251                    | E254                    |

**Table S3.** Residues involved in substrate binding and catalysis in the different pockets of APF1 (Goettig et al., 2002 and 2005). The counterpart residues for PsyPAH and other S33 family members were obtained by structural superposition. Numbering is that from the different PDBs used for superposition: APF1 (PDB 1XRP), PsyPAH (PDB 7A6G), amidohydrolase VinJ (PDB 3WMR) and MysPAP (PDB 3NWO). <sup>#</sup>Displaced loop. <sup>a</sup>Catalytic triad. <sup>b</sup>Oxyanion hole. <sup>c</sup>Interaction with peptide N termini.

| APF1<br>(1XRP)      | PsyPAH<br>(7A6G) | VinJ<br>(3WMR) | MysPA<br>P |
|---------------------|------------------|----------------|------------|
| Y178                | Y186             | Y183           | Y186       |
| V192                | V200             | F197           | F200       |
| L196                | F204             | F201           | V204       |
| A199                | I207             | I204           | M207       |
| Y205                | Y214             | Y211           | Y214       |
| Additional residues |                  |                |            |
| Q171*               | T180*            | F176           | L179*      |
| E200                | D208             | Y205           | E208       |

**Table S4.** Comparison of residues proposed in the polyketide binding tunnel in VinJ (Shinohara et al., 2014). The counterpart residues for PsyPAH, APF1 and MysPAP were obtained by structural superposition. Numbering is that from the different PDBs used for superposition: APF1 (PDB 1XRP), PsyPAH (PDB 7A6G), amidohydrolase VinJ (PDB 3WMR) and MysPAP (PDB 3NWO). \*Lateral chains displaced with respect to F176<sup>VinJ</sup>.

## References

- Goettig, P.; Groll, M.; Kim, J.S.; Huber, R.; Brandstetter, H. Structures of the tricorn-interacting aminopeptidase F1 with different ligands explain its catalytic mechanism. *EMBO J* **2002**, *21*, 5343-5352, doi:10.1093/emboj/cdf552.
- Goettig, P.; Brandstetter, H.; Groll, M.; Göhring, W.; Konarev, P.V.; Svergun, D.I.; Huber, R.; Kim, J.S. X-ray snapshots of peptide processing in mutants of tricorn-interacting factor F1 from *Thermoplasma acidophilum*. *J Biol Chem* **2005**, *280*, 33387-33396, doi:10.1074/jbc.M505030200
- Holm, L. DALI and the persistence of protein shape. *Protein Sci* **2020**, *29*, 128-140, doi:10.1002/pro.3749
- Letunic, I.; Bork, P. Interactive Tree Of Life (iTOL) v4: recent updates and new developments. *Nucleic Acids Res* **2019**, *47*, W256-W259, doi:10.1093/nar/gkz239.
- Shinohara, Y.; Miyanaga, A.; Kudo, F.; Eguchi, T. The crystal structure of the amidohydrolase VinJ shows a unique hydrophobic tunnel for its interaction with polyketide substrates. *FEBS Lett* **2014**, *588*, 995-1000, doi:10.1016/j.febslet.2014.01.060.
